# Supplementary material for: Robust metal–organic framework monoliths for long-term cycling lithium metal batteries
Source: Royal Society of Chemistry journal article supplement (doi:10.1039/d4ta00488d), 2024-01-01
Supplement: d4ta00488d1.pdf [file d4ta00488d1.pdf]

## Supplementary Information

### **Robust metal–organic framework monoliths for long-cycling lithium metal batteries**

*Chaejeong Kim<sup>‡a</sup>, Wooyoung Jeong<sup>‡b</sup>, Hong Rim Shin<sup>a</sup>, Kyu-Nam Jung<sup>\*c</sup>, Jong-Won Lee<sup>\*a</sup>*

<sup>a</sup> Division of Materials Science and Engineering, Hanyang University, 222 Wangsimni-ro, Seongdong-gu, Seoul 04763, Republic of Korea

<sup>b</sup> Department of Energy Science and Engineering, Daegu Gyeongbuk Institute of Science and Technology (DGIST), 333 Techno Jungang-daero, Hyeonpung-eup, Dalseong-gun, Daegu 42988, Republic of Korea

<sup>c</sup> Renewable Energy Institute, Korea Institute of Energy Research (KIER), 152 Gajeong-ro, Yuseong-gu, Daejeon 34129, Republic of Korea

<sup>‡</sup> These authors contributed equally to this work.

<sup>\*</sup> Corresponding authors.

*E-mail addresses:* mitamire@kier.re.kr (K.-N. Jung), jongwonlee@hanyang.ac.kr (J.-W. Lee)

**Supplementary note 1** Experimental details on the liquid adsorption test

The porosity of the membrane was calculated by the following formula:

$$\text{Porosity} = \frac{\frac{W_s - W_m}{\rho_b}}{\frac{W_s - W_m}{\rho_b} + \frac{W_m}{\rho_m}} \times 100\%$$

where  $w_m$  and  $w_s$  are weights of the dry membrane and the membrane soaked in 2-propanol for 1h, respectively.  $\rho_b$  and  $\rho_m$  are the density of 2-propanol and dry membrane, respectively.

Similarly, electrolyte uptakes of membranes were calculated by the following formula:

$$\text{Electrolyte uptake} = \frac{(w_e - w_m)}{w_m} \times 100\%$$

where  $w_e$  is weight of the membrane soaked in the liquid electrolyte for 2 h.

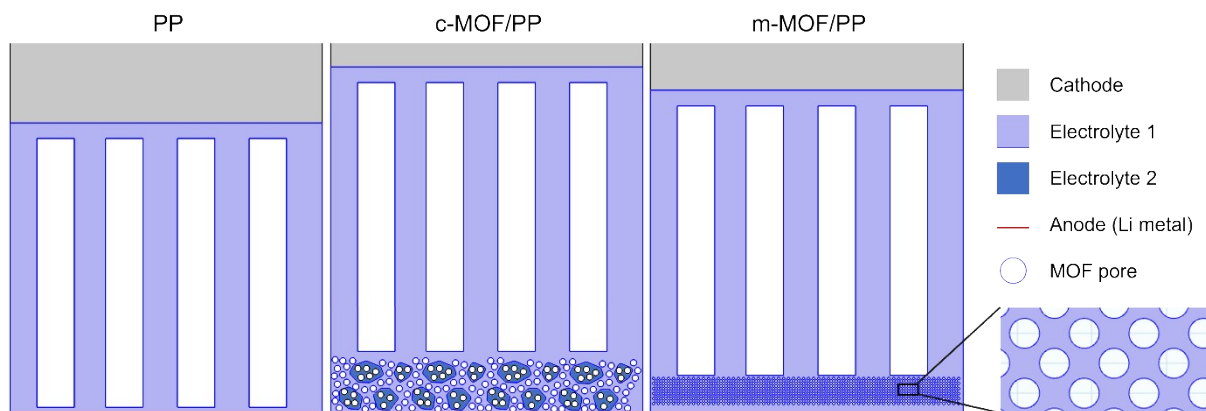

**Fig. S1** Geometries of LMBs for the electrochemical simulations.

**Table S1** Parameters used for 2D electrochemical modeling.

| Parameter                                          | PP                 | c-MOF/PP                                                  | m-MOF/PP           |
|----------------------------------------------------|--------------------|-----------------------------------------------------------|--------------------|
| $i_1$ (mA cm <sup>-2</sup> )                       | 3                  | 3                                                         | 3                  |
| $\sigma_1$ (S cm <sup>-1</sup> )                   | $1 \times 10^{-3}$ | $1 \times 10^{-3}$ (bulk),<br>$1 \times 10^{-7}$ (binder) | $1 \times 10^{-3}$ |
| Li <sup>+</sup> transference number ( $t_{Li^+}$ ) | 0.25               | 0.25                                                      | 0.25               |
| $c_1$ (mol L <sup>-1</sup> )                       | 1                  | 1                                                         | 1                  |
| $i_{0,ref}$ (A m <sup>-2</sup> )                   | 100                | 100                                                       | 100                |
| $\alpha_a$                                         | 0.5                | 0.5                                                       | 0.5                |

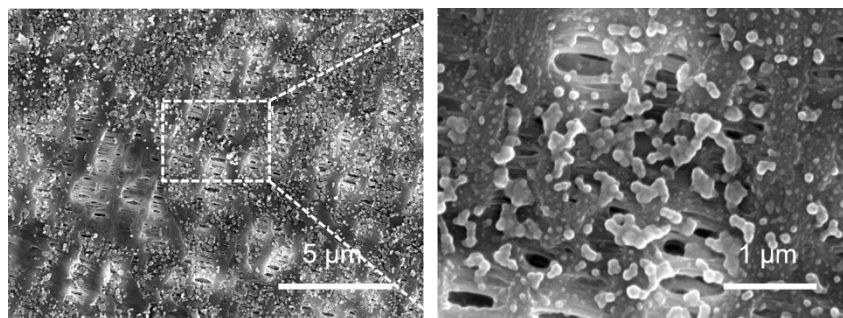

**Fig. S2** SEM images of the m-MOF/PP after nucleation, confirming that the rhombic dodecahedral structure of ZIF-8 is not formed.

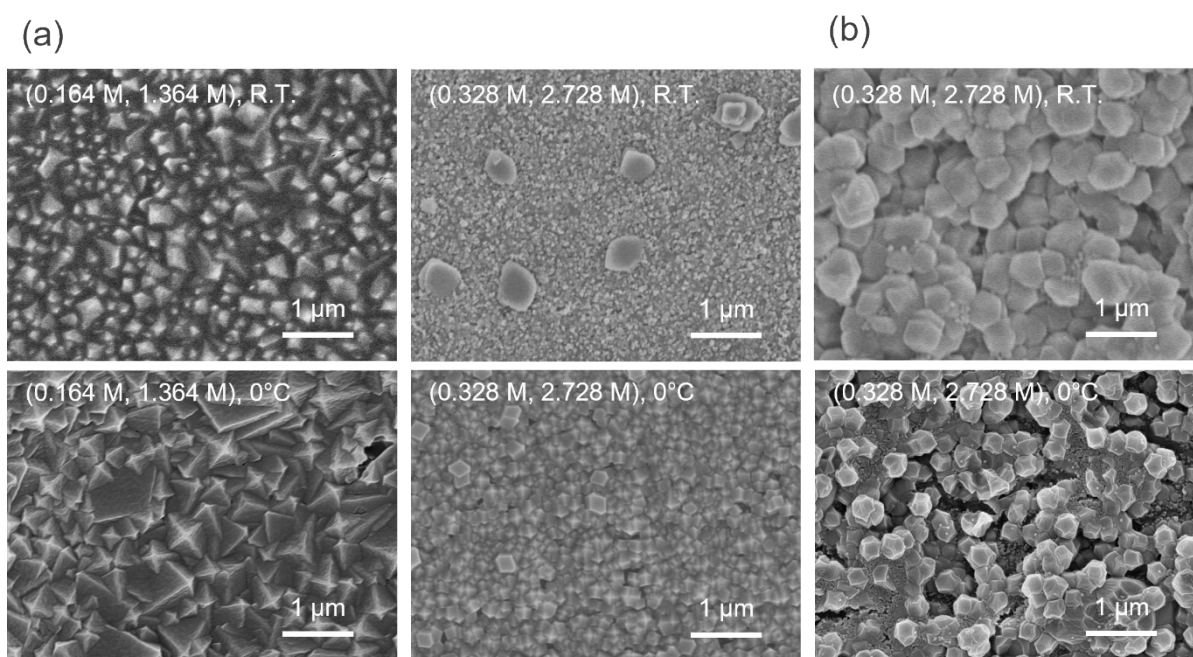

**Fig. S3** SEM images of the m-MOF/PP synthesized under different conditions, such as types and concentrations of precursors and the temperature for the growth process. The precursors are (a) zinc acetate dihydrate, 2-methyl imidazole, and (b) zinc nitrate hexahydrate, 2-methyl imidazole. The concentration of precursors is shown in each image, as follows (Zn metal precursor, 2-methylimidazole). When using the zinc acetate dihydrate as Zn source, small well-defined cubic crystals of MOF are formed due to a high nucleation rate for zinc acetate precursor.<sup>S1</sup> A high concentration of precursors leads to equilibria shifting toward enhanced metal-ligand complexation thereby stopping crystal growth, resulting in small particles.<sup>S1</sup> The decrease in temperature of synthesis process induces the particles exhibiting higher purity and perfection.<sup>S2</sup>

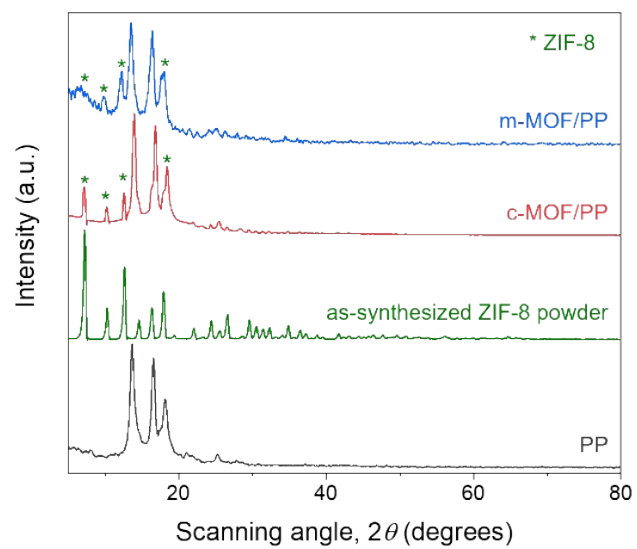

**Fig. S4** XRD patterns of the m-MOF/PP, c-MOF/PP, MOF particle and PP.

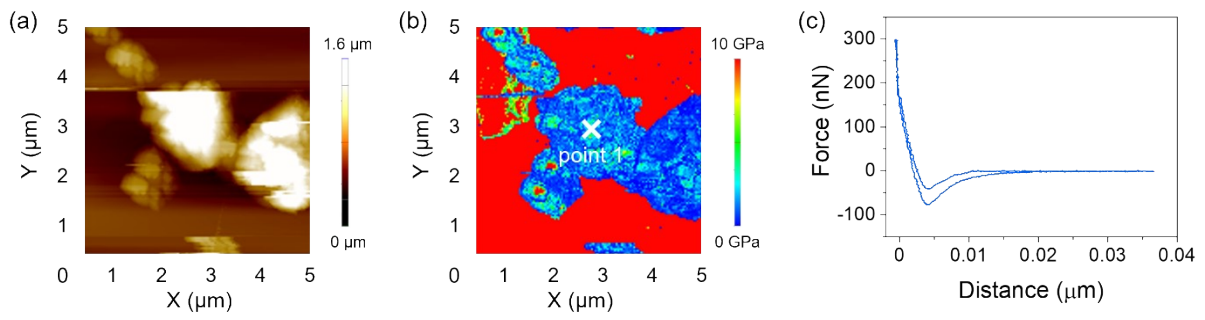

**Fig. S5** (a) Topology and (b) distribution of  $E$  value of MOF particle on Si wafer, (c) FD curve of MOF particle at point 1, acquired using AFM.



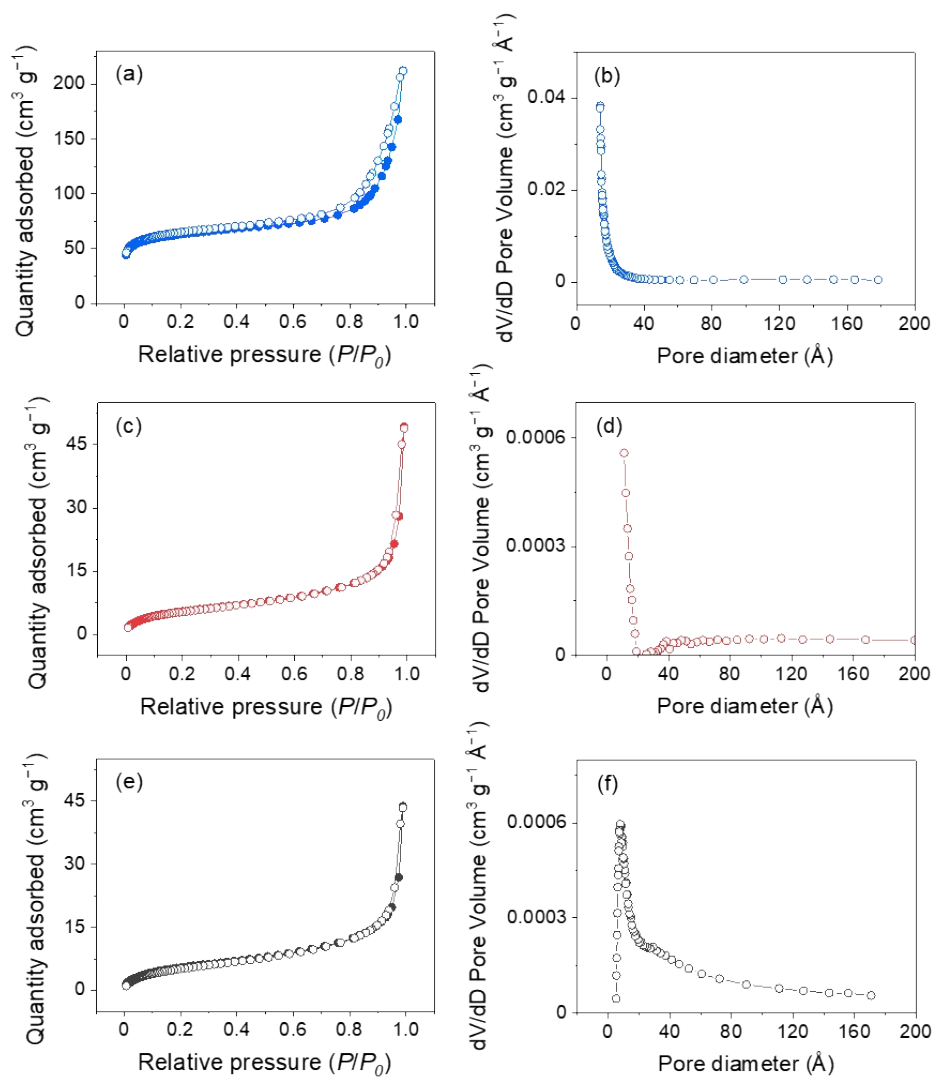

**Fig. S6** (a, c, e)  $N_2$  adsorption–desorption isotherm and (b, d, f) pore size distribution of (a, b) the m-MOF/PP, (c, d) the c-MOF/PP, and (e, f) PP.

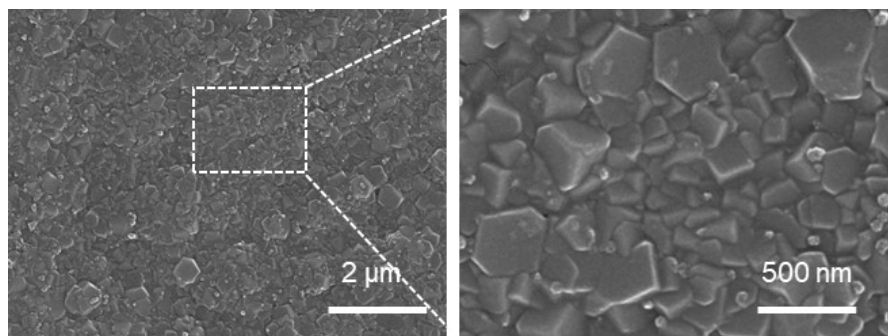

**Fig. S7** FE-SEM images of m-MOF/PP membrane after electrolyte impregnation.

---

| Separator | m-MOF/PP | c-MOF/PP | PP |
|-----------|----------|----------|----|
| SSIP (%)  | 34       | 40       | 89 |
| CIP (%)   | 67       | 60       | 11 |

---

**Table S2** Relative amounts of the SSIP and CIP in various membranes.

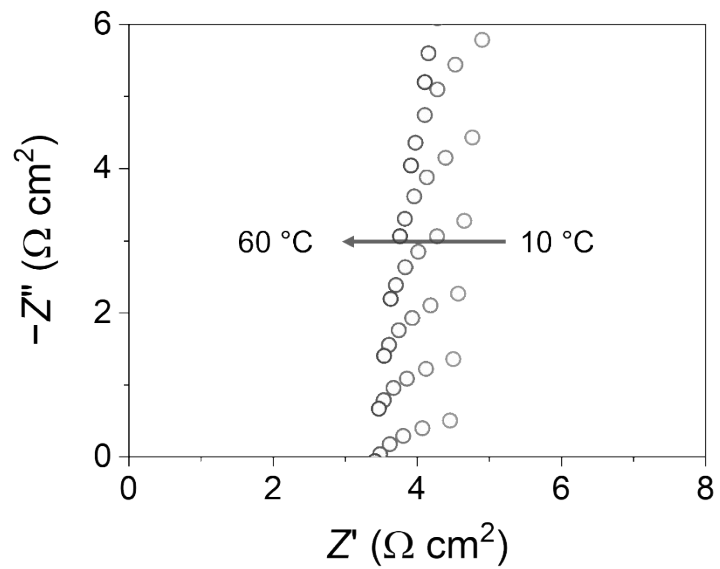

**Fig. S8** AC-impedance spectra of electrolyte-impregnated PP at temperatures ranging from 10 to 60 °C.

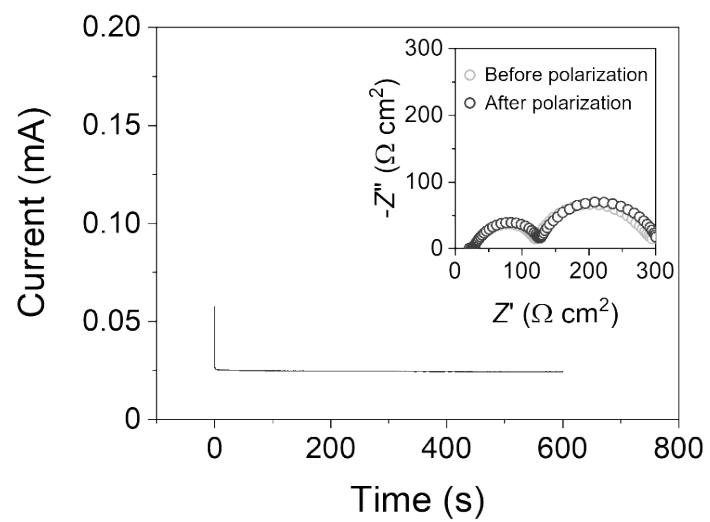

**Fig. S9** DC polarization curve and AC-impedance spectra of electrolyte-impregnated PP.

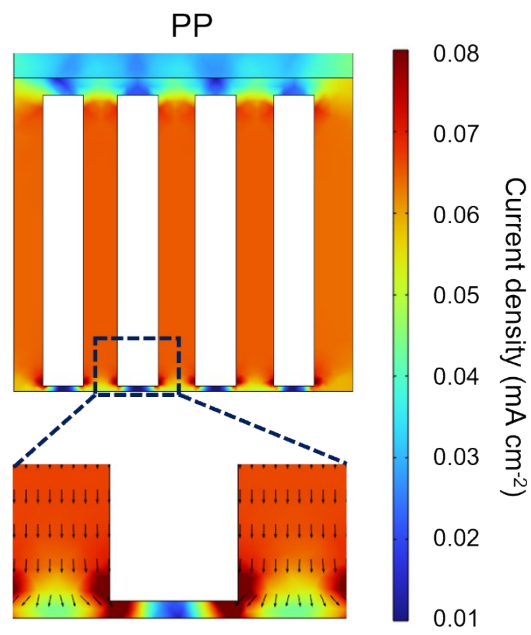

**Fig. S10** Electrochemical modeling results for Li<sup>+</sup> flux and local current densities through PP.

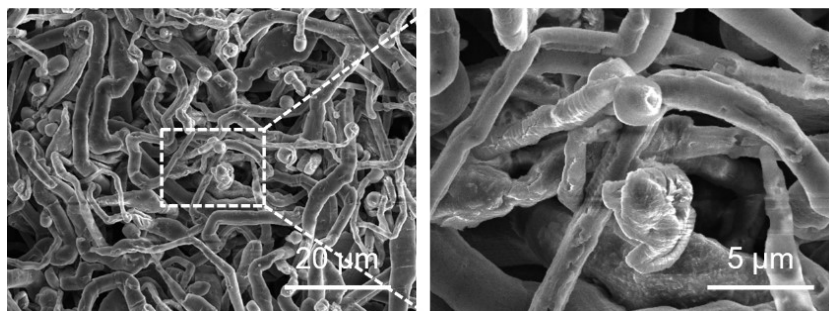

**Fig. S11** SEM images of Cu substrate after Li deposition with a capacity of  $10 \text{ mAh cm}^{-2}$  at  $1 \text{ mA cm}^{-2}$  using [Li || Cu] cell with the PP.

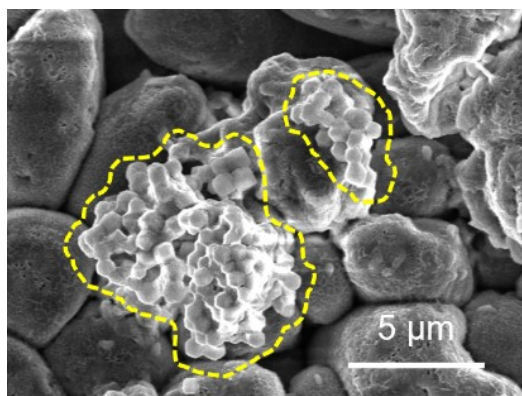

**Fig. S12** SEM images of Cu substrate after Li deposition with a capacity of  $10 \text{ mAh cm}^{-2}$  at  $1 \text{ mAh cm}^{-2}$  using [Li || Cu] cell with the c-MOF/PP, showing the MOF particles exfoliated from the c-MOF/PP (inside the yellow dotted line).



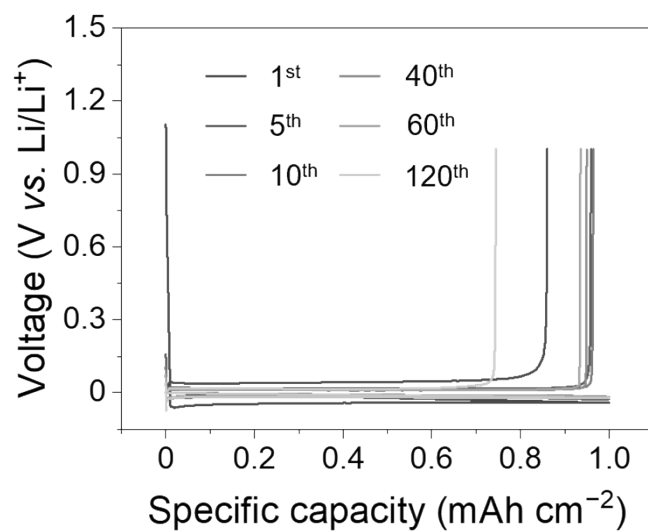

**Fig. S13** Voltage profiles of [Li || Cu] cell with the PP measured during Li plating–stripping at 0.5 mA cm<sup>-2</sup>.

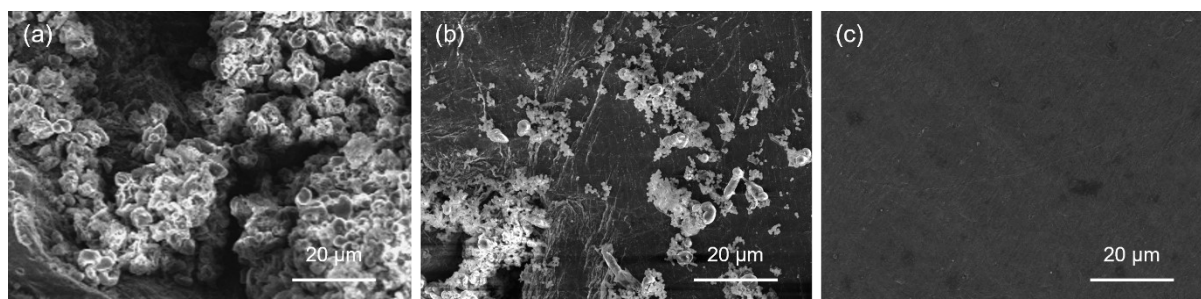

**Fig. S14** Top view SEM images of Li anodes after 50 cycles using the [Li || Li] cells with the (a) PP, (b) c-MOF/PP and (c) m-MOF/PP.

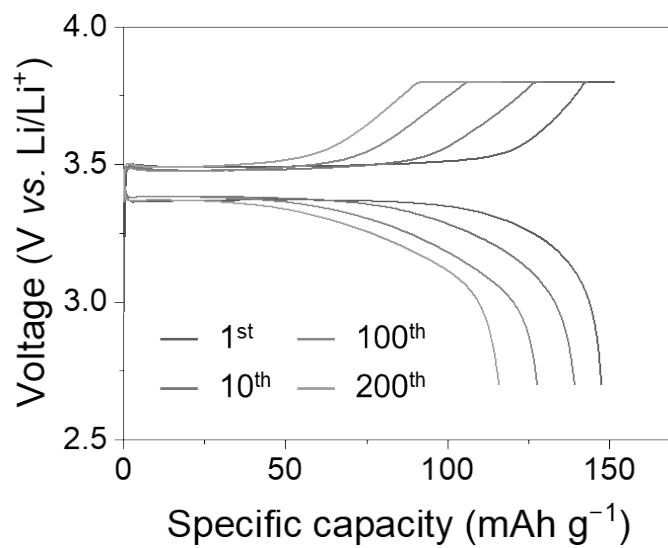

**Fig. S15** Charge–discharge profiles of full cells with PP measured at 0.5C.

**Table S3** Comparison of the electrochemical performances of the [Li || LFP] full cell using MOF-based membranes.

| Membrane              | Fabrication method | Test condition                                          |        | Capacity retention     | Ref.      |
|-----------------------|--------------------|---------------------------------------------------------|--------|------------------------|-----------|
|                       |                    | Electrolyte                                             | C-rate |                        |           |
| PI-ZIF8               | Slurry-casting     | 1 M LiPF <sub>6</sub> in EC/DMC/DEC /PEGDA/BMA          | 1C     | 75.2% after 300 cycles | [S3]      |
| Hollow ZIF-8 membrane | Slurry-casting     | 1 M LiPF <sub>6</sub> in EC:DEC = 1:1 vol%              | 0.1C   | 85.1% after 100 cycles | [S4]      |
| UIO-66/PAN/PVDF       | Electrospinning    | 1 M LiPF <sub>6</sub> solution                          | 1C     | 94.9% after 100 cycles | [S5]      |
| 3D-UIO-66/PAN         | Electrospinning    | LiTFSI-PEO ([EO]:LiTFSI = 18:1)                         | 0.2C   | 86% after 300 cycles   | [S6]      |
| m-MOF/PP              | Direct growth      | 1 M LiTFSI in DOL:DME = 1:1 with 1wt% LiNO <sub>3</sub> | 0.5C   | 96.6% after 300 cycles | This work |

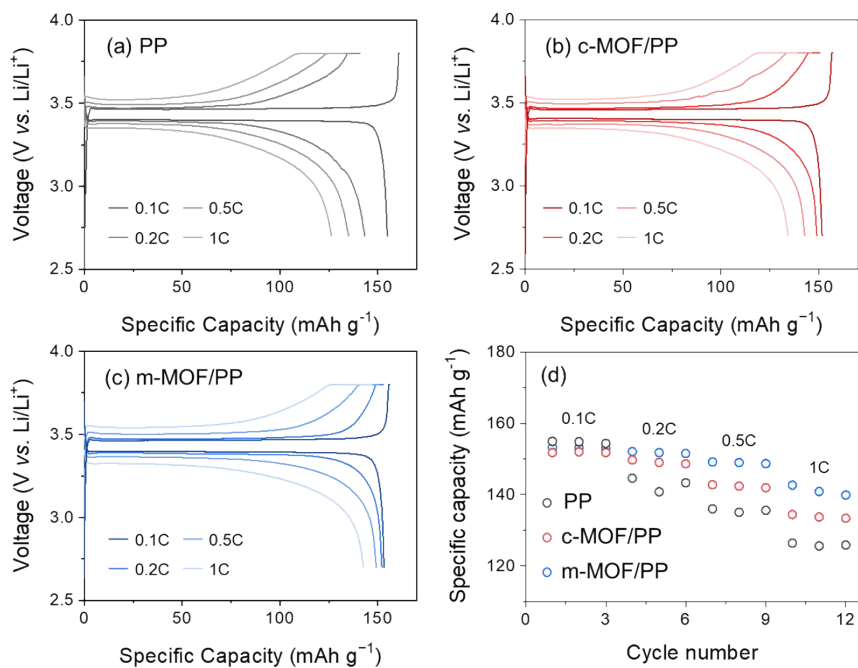

**Fig. S16** Voltage profiles of the [Li || LFP] full cells using (a) PP, (b) c-MOF/PP, and (c) m-MOF/PP membrane operated at 0.1–1C. (d) Rate performances of the full cells using various membranes at 30 °C.

## References

- S1. A. G. Zavyalova, D. V. Kladko, I. Y. Chernyshov, V. V. Vinogradov, *J. Mater. Chem. A*, 2021, **9**, 25258.
- S2. P. Chowdhury, C. Bikkina, D. Meister, F. Dreisbach, S. Gumma, *Microporous Mesoporous Mat.*, 2009, **117**, 406–413.
- S3. G. Wang, P. He, L.-Z. Fan, *Adv. Funct. Mater.*, 2021, **31**, 2007198.
- S4. L. Tian, Z. Liu, ;F. Tao, M. Liu, Z. Liu, *Dalton Trans.*, 2021, **50**, 13877–13882.
- S5. Q. Fu, W. Zhang, I. P. Muhammad, X. Chen, Y. Zeng, B. Wang, S. Zhang, *Microporous Mesoporous Mater.*, 2021, **311**, 110724.
- S6. Z. Li, S. Wang, J. Shi, Y. Liu, S. Zheng, H. Zou, Y. Chen, W. Kuang, L. Chen, Y. Lan, Y. Cai, Q. Zheng, *Energy Storage Mater.*, 2022, **47**, 262–270.
